# Supplementary material
Source: PubMed Central journal article supplement (PMC4465557)

Supplementary Figure 1: Guzman et al.

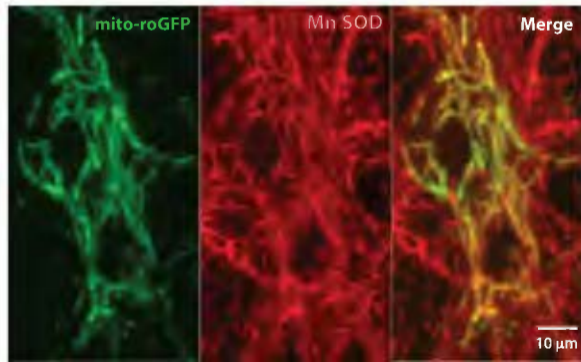

# Supplementary Figure 2: Guzman et al.

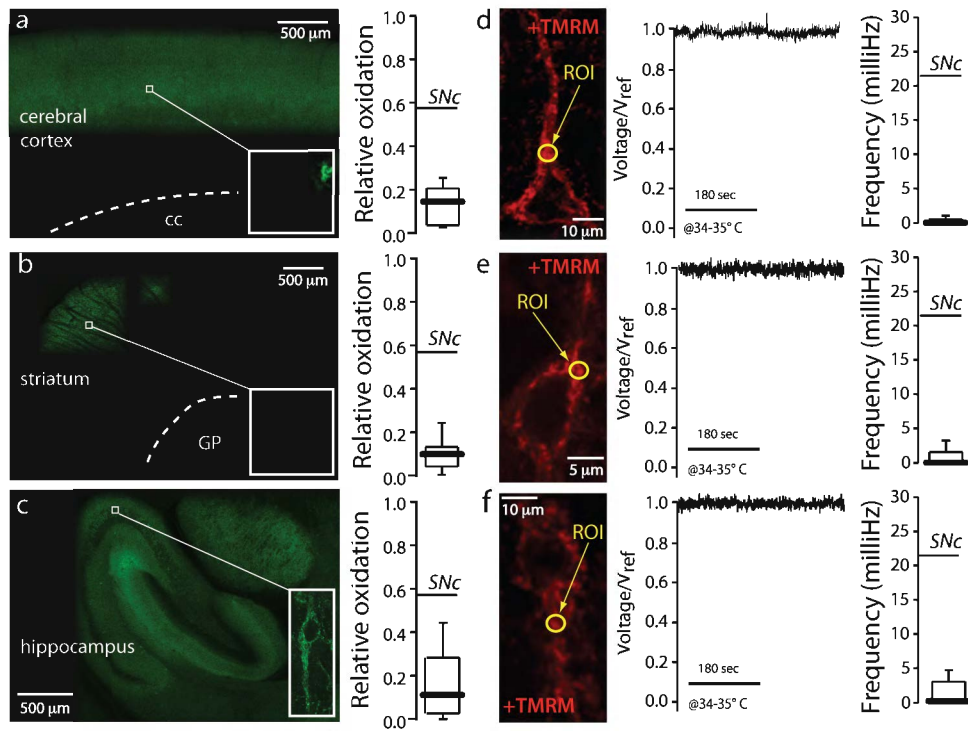

# Supplementary Figure 3: Guzman et al.

SNc DA neuron

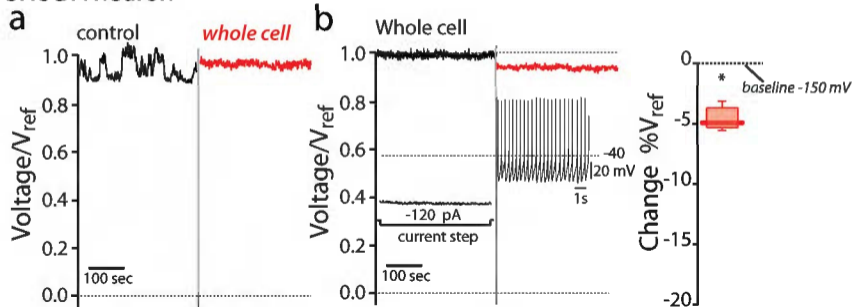

# Supplementary Figure 4: Guzman et al.

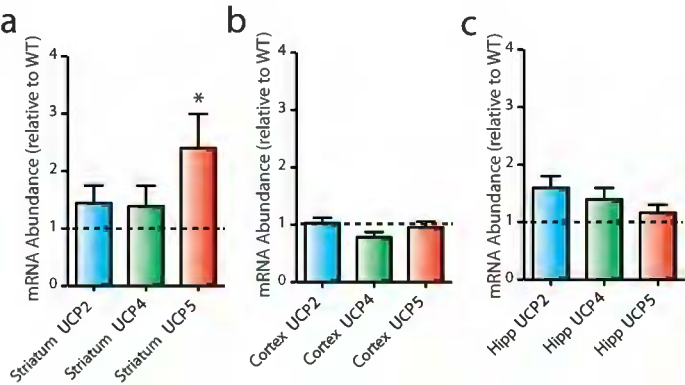

# Supplementary Figure 5: Guzman et al

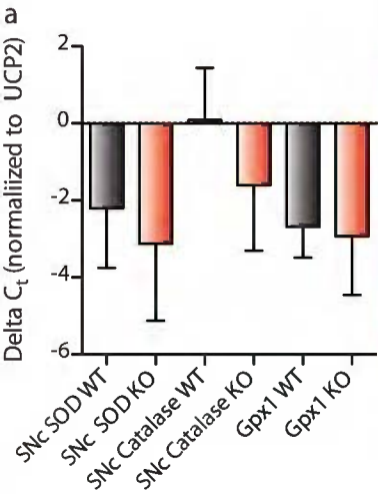

**b**

Mn-SOD immunohistochemistry

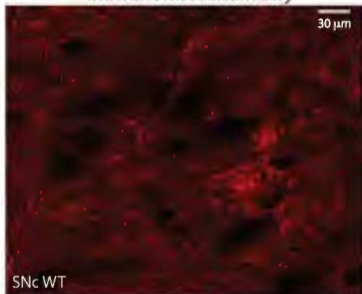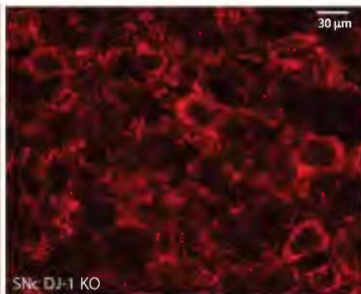

# Supplementary Figure 6: Guzman et al.

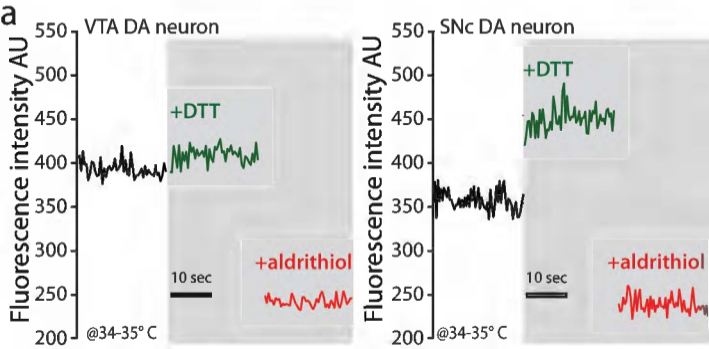

Supplementary Figure 7: Guzman et al.

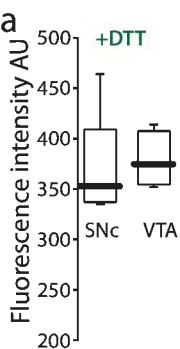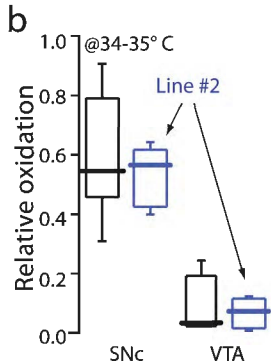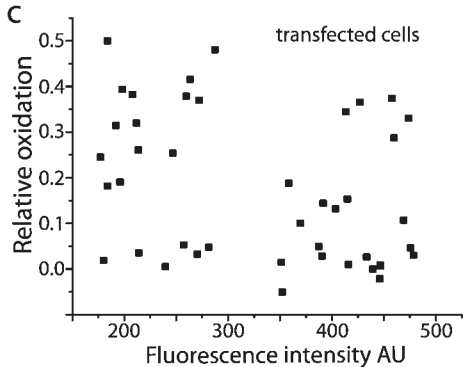

Supplement: NIHMS241272-supplement-01.pdf [file NIHMS241272-supplement-01.pdf]
